# Supplementary material for: Synthesis of N-doped carbon nanosheets with controllable porosity derived from bio-oil for high-performance supercapacitors
Source: Royal Society of Chemistry journal article supplement (doi:10.1039/c8ta07563h), 2018-01-01
Supplement: c8ta07563h1.pdf [file c8ta07563h1.pdf]

## Supplementary material

### **Synthesis of N-doping carbon nanosheets with controllable porosity derived from bio-oil for high-performance supercapacitors**

Qun Wang, Bin Qin, Xiaohua Zhang, Xiaoling Xie, Li'e Jin, Qing Cao\*

College of Chemistry and Chemical Engineering, Taiyuan University of Technology,  
Taiyuan, Shanxi, 030024, P.R. China.

#### **Content:**

**Fig. S1** Cyclic voltammetry curves for ABF-9%M with the scan rate of 50 mV s<sup>-1</sup>

(a) and 10 mV s<sup>-1</sup> using 2M KCl and 6M KOH as the electrolyte.

**Fig. S2** Plot of Bode phase angle with frequency.

**Table S1** Comparison of the specific capacitance of ABF-9%M with reported biomass-derived carbon materials previously.

**Table S2.** Equivalent circuit parameters of the ABFs.

\* Corresponding author.

E-mail address: qcao2000@163.com (Q. Cao).

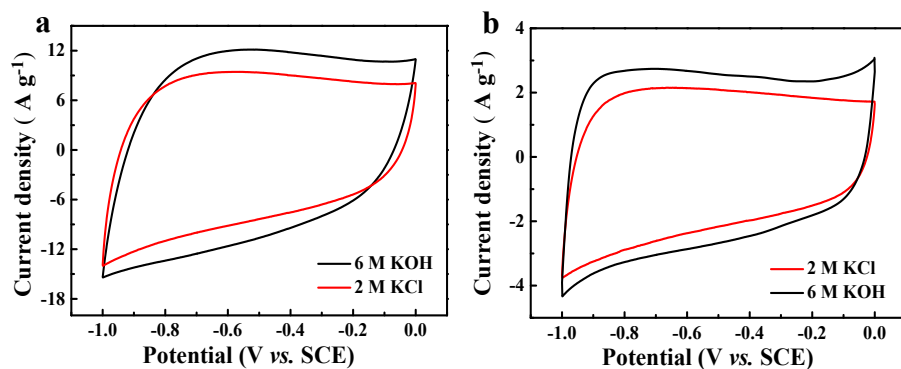

**Fig. S1** Cyclic voltammetry curves for ABF-9%M with the scan rate of  $50 \text{ mV s}^{-1}$  (a) and  $10 \text{ mV s}^{-1}$  using 2M KCl and 6M KOH as the electrolyte.

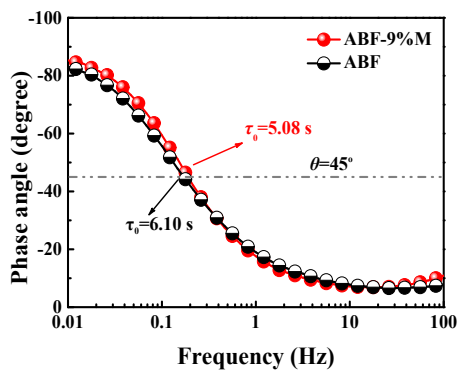

**Fig. S2** Plot of Bode phase angle with frequency.

**Table S1** Comparison of the specific capacitance of ABF-9%M with reported biomass-derived carbon materials previously.

| Precursors | $S_{\text{BET}}$<br>( $\text{m}^2 \text{g}^{-1}$ ) | C/S                           | C<br>( $\text{F g}^{-1}$ ) | Electrolyte                 | Ref. |
|------------|----------------------------------------------------|-------------------------------|----------------------------|-----------------------------|------|
| Bamboo     | 1732                                               | 0.5 A $\text{g}^{-1\text{b}}$ | 222                        | 6 M KOH                     | 1    |
| Bark       | 1721                                               | 0.5 A $\text{g}^{-1\text{b}}$ | 206                        | 1 M $\text{H}_2\text{SO}_4$ | 2    |
| Rapeseed   | 1417                                               | 5 mV $\text{s}^{-1\text{b}}$  | 171                        | 1 M $\text{H}_2\text{SO}_4$ | 3    |
| Carrot     | 1899                                               | 0.2 A $\text{g}^{-1\text{b}}$ | 276                        | 6 M KOH                     | 4    |
| Chitosan   | 1582                                               | 0.5 A $\text{g}^{-1\text{b}}$ | 252                        | 6 M KOH                     | 5    |
| tofu       | 1208                                               | 0.5 A $\text{g}^{-1\text{b}}$ | 262                        |                             |      |
|            |                                                    | 50 A $\text{g}^{-1\text{b}}$  | 145                        | 6 M KOH                     | 6    |
| Raspberry  | 1234                                               | 0.1 A $\text{g}^{-1\text{b}}$ | 213                        | 6 M KOH                     | 7    |
| Bagasse    | 1360                                               | 5 mV $\text{s}^{-1\text{a}}$  | 173                        | 6 M KOH                     | 8    |
| Agar       | 1672                                               | 1 A $\text{g}^{-1\text{b}}$   | 226                        | 6 M KOH                     | 9    |
| Soybean    | 1749                                               | 0.5 A $\text{g}^{-1\text{b}}$ | 243                        | 6 M KOH                     | 10   |
| catkin     | 1462                                               | 0.5 A $\text{g}^{-1\text{b}}$ | 251                        | 6 M KOH                     | 11   |
| Bio-oil    | 2566                                               | 0.5 A $\text{g}^{-1\text{b}}$ | 289                        | 6 M KOH                     | This |
|            |                                                    | 20 A $\text{g}^{-1\text{b}}$  | 227                        |                             | work |
|            |                                                    | 0.5 A $\text{g}^{-1\text{a}}$ | 256                        |                             |      |

C/S represents current density or sweep rate; <sup>a</sup> two electrode; <sup>b</sup> three electrode

**Table S2** Equivalent circuit parameters of the ABFs.

| Sample  | $R_s$ ( $\Omega$ ) | $R_{\text{ct}}$ ( $\Omega$ ) | $f_o$ (Hz) | $\tau_0$ (s) |
|---------|--------------------|------------------------------|------------|--------------|
| ABF     | 0.94               | 0.71                         | 0.16       | 6.10         |
| ABF-9%M | 0.64               | 0.87                         | 0.20       | 5.08         |

## Reference

- 1 Y. Gong, D. Li, C. Luo, Q. Fu and C. Pan, *Green Chem.*, 2017, **19**, 4132-4140.
- 2 Z. Sun, J. Liao, B. Sun, M. He, X. Pan, J. Zhu, C. Shi and Y. Jiang, *Int. J. Electrochem. Sci.*, 2017, **12**, 12084-12097.
- 3 X. Kang, H. Zhu, C. Wang, K. Sun and J. Yin, *J. Colloid Interface Sci.*, 2018, **509**, 369-383.
- 4 Y. Cheng, B. Li, Y. Huang, Y. Wang, J. Chen, D. Wei, Y. Feng, D. Jia and Yu. Zhou, *Appl. Surf. Sci.*, 2018, **439**, 712-723.
- 5 X. Deng, B. Zhao, L. Zhu and Z. Shao, *Carbon*, 2015, **93**, 48-58.
- 6 T. Ouyang, K. Cheng, F. Yang, L. Zhou, K. Zhu, K. Ye, G. Wang and D. Cao, *J. Mater. Chem. A*, 2017, **5**, 14551-14561.
- 7 Y. Yao, Q. Zhang, P. Liu, L. Yu, L. Huang, S. Z. Zeng, L. Liu, X. Zeng and J. Zou, *RSC Advances*, 2018, **8**, 1857-1865.
- 8 S. S. Gunasekaran, S. K. Elumalali, T. K. Kumaresan, R. Meganathan, A. Ashok, V. Pawar, K. VEDIAPPAN, G. Ramasamy, S. Z. Karazhanov, K. Raman and R. S. Bose, *Materials Letters*, 2018, **218**, 165-168.
- 9 L. Zhang, H. Gu, H. Sun, F. Cao, Y. Chen and G. Z. Chen, *Carbon*, 2018, **132**, 573-579.
- 10 G. Lin, R. Ma, Y. Zhou, Q. Liu, X. Dong and J. Wang, *Electrochim. Acta*, 2018, **261**, 49-57.
- 11 S. Gao, X. Li, L. Li and X. Wei, *Nano Energy*, 2017, **33**, 334-342.
